# Supplementary material
Source: MDPI journal article supplement (https://www.mdpi.com/2077-1312/9/12/1435)
Supplement: s1 [file s1]

## Supplementary material

Tables S1. Monthly and annual wind frequency for the periods 2016, 2017, and 2019.

| 2016     |             |             |             |             |             |             |             |             |             |             |             |             |                  |
|----------|-------------|-------------|-------------|-------------|-------------|-------------|-------------|-------------|-------------|-------------|-------------|-------------|------------------|
| Wind     | Month       |             |             |             |             |             |             |             |             |             |             |             | Average for year |
|          | 1           | 2           | 3           | 4           | 5           | 6           | 7           | 8           | 9           | 10          | 11          | 12          |                  |
| N        | 18.1        | 8.6         | 14.1        | 10.4        | 9.3         | 8.3         | 16.5        | <b>20.2</b> | <b>16.7</b> | 25.8        | <u>23.8</u> | <u>24.2</u> | 16.4             |
| NE       | <u>20.2</u> | 22.8        | 13.3        | 13.3        | <b>18.1</b> | <u>35.0</u> | <u>24.2</u> | <u>24.2</u> | <u>38.8</u> | <u>39.9</u> | <u>23.8</u> | <u>23.8</u> | <u>24.8</u>      |
| E        | 18.5        | <u>28.4</u> | <u>20.2</u> | <b>22.5</b> | 14.1        | 16.3        | 8.5         | 10.5        | 10.4        | 8.9         | 14.2        | 7.7         | 14.9             |
| SE       | <b>19.4</b> | <b>25.0</b> | <b>19.0</b> | <u>25.4</u> | <u>25.4</u> | <b>24.6</b> | 13.3        | 10.1        | 5.8         | 4.8         | 18.3        | 10.1        | <b>16.7</b>      |
| S        | 0.4         | 4.3         | 3.2         | 5.4         | 6.5         | 4.6         | 3.6         | 3.6         | 4.2         | 0.4         | 1.7         | 0.4         | 3.2              |
| SW       | 10.5        | 5.2         | 15.3        | 9.2         | 17.7        | 7.5         | <b>21.0</b> | 11.7        | 6.7         | 8.5         | 7.9         | 6.9         | 10.7             |
| W        | 4.8         | 1.3         | 7.7         | 9.2         | 6.5         | 2.5         | 6.5         | 12.9        | 5.8         | 8.1         | 3.8         | 10.1        | 6.6              |
| NE       | 8.1         | 4.3         | 7.3         | 4.6         | 2.4         | 1.3         | 6.5         | 6.9         | 11.7        | 3.6         | 6.7         | 16.9        | 6.7              |
| > 12 m/s | <b>25.8</b> | <b>21.1</b> | 11.7        | 5.4         | 5.2         | <u>13.8</u> | 4.0         | 2.8         | 6.2         | <b>14.5</b> | 12.9        | <b>21.4</b> | 12.1             |

| 2017     |             |             |             |             |             |             |             |             |             |             |             |             |                  |
|----------|-------------|-------------|-------------|-------------|-------------|-------------|-------------|-------------|-------------|-------------|-------------|-------------|------------------|
| Wind     | Month       |             |             |             |             |             |             |             |             |             |             |             | Average for year |
|          | 1           | 2           | 3           | 4           | 5           | 6           | 7           | 8           | 9           | 10          | 11          | 12          |                  |
| N        | <b>16.5</b> | 12.9        | 13.7        | 11.3        | 10.1        | 10.8        | <u>19.8</u> | <u>18.1</u> | <b>16.7</b> | 9.3         | 16.3        | 14.5        | 14.2             |
| NE       | <u>24.2</u> | <b>25.0</b> | <b>20.6</b> | 11.7        | <b>17.3</b> | <b>19.6</b> | <u>22.2</u> | <u>37.9</u> | <u>33.8</u> | <u>28.6</u> | <u>28.3</u> | <b>16.5</b> | <u>23.8</u>      |
| E        | 16.1        | 17.9        | 19.4        | 11.3        | 16.1        | 14.2        | 7.7         | 8.5         | 9.6         | 11.3        | <b>17.1</b> | <u>33.9</u> | 15.2             |
| SE       | 14.1        | <u>25.9</u> | <u>24.2</u> | <u>22.1</u> | <u>29.4</u> | <u>25.8</u> | 11.3        | 11.3        | 9.6         | <b>15.7</b> | 13.3        | <b>15.3</b> | <b>18.1</b>      |
| S        | 1.2         | 0.9         | 5.2         | 7.9         | 4.0         | 3.8         | 3.6         | 3.6         | 2.9         | 1.6         | 1.7         | 0.8         | 3.1              |
| SW       | 7.3         | 4.0         | 7.7         | <b>19.2</b> | 9.7         | 14.2        | 15.7        | 8.5         | 11.7        | 12.9        | 7.5         | 6.5         | 10.4             |
| W        | 9.7         | 6.7         | 6.9         | 11.7        | 10.1        | 8.3         | 11.3        | 7.3         | 8.3         | 10.5        | 6.7         | 5.6         | 8.6              |
| NE       | 10.9        | 6.7         | 2.4         | 5.0         | 3.2         | 3.3         | 8.5         | 4.8         | 7.5         | 10.1        | 9.2         | 6.9         | 6.5              |
| > 12 m/s | <b>21.8</b> | <u>26.3</u> | 6.5         | 7.9         | 2.4         | <u>0.01</u> | 5.6         | <b>17.3</b> | <b>15.0</b> | 15.7        | 1.7         | 10.5        | 10.9             |

| 2019 |             |             |             |             |             |             |             |             |             |             |             |             |                  |
|------|-------------|-------------|-------------|-------------|-------------|-------------|-------------|-------------|-------------|-------------|-------------|-------------|------------------|
| Wind | Month       |             |             |             |             |             |             |             |             |             |             |             | Average for year |
|      | 1           | 2           | 3           | 4           | 5           | 6           | 7           | 8           | 9           | 10          | 11          | 12          |                  |
| N    | 7.3         | <b>23.7</b> | 14.9        | 14.6        | 12.1        | 12.1        | <u>21.0</u> | <u>22.2</u> | <u>16.3</u> | <b>18.5</b> | <b>11.3</b> | <u>15.8</u> | <u>15.8</u>      |
| NE   | 16.5        | <u>24.1</u> | <u>16.1</u> | <u>28.8</u> | <u>19.4</u> | <u>28.3</u> | <u>21.0</u> | <u>32.3</u> | <u>47.5</u> | <u>28.2</u> | <u>41.3</u> | <u>27.0</u> | <u>27.5</u>      |
| E    | <u>27.0</u> | 14.7        | <u>15.3</u> | 12.1        | 14.9        | 10.8        | 8.1         | 4.0         | 7.1         | 11.3        | <u>21.2</u> | <u>27.4</u> | 14.5             |

|          |             |      |      |             |             |      |             |             |             |             |      |      |             |
|----------|-------------|------|------|-------------|-------------|------|-------------|-------------|-------------|-------------|------|------|-------------|
| SE       | <u>27.0</u> | 13.8 | 14.1 | <u>16.2</u> | <u>25.8</u> | 15.4 | 11.3        | 10.9        | 7.5         | <u>12.1</u> | 10.8 | 14.1 | <u>15.0</u> |
| S        | 1.6         | 0.9  | 3.2  | 5.4         | 4.8         | 3.3  | 4.4         | 3.2         | 3.3         | 6.5         | 2.5  | 0.8  | 3.3         |
| SW       | 6.5         | 9.4  | 11.7 | 8.7         | 10.5        | 14.2 | 10.9        | 8.5         | 7.1         | 8.1         | 5.8  | 3.6  | 8.7         |
| W        | 5.2         | 8.9  | 14.5 | 10.0        | 9.3         | 10.8 | <u>16.5</u> | <u>15.7</u> | 7.9         | 9.3         | 5.4  | 3.6  | 9.8         |
| NE       | 8.9         | 4.5  | 10.1 | 4.2         | 3.2         | 5.0  | 6.8         | 3.2         | 3.3         | 6.0         | 1.7  | 7.7  | 5.4         |
| > 12 m/s | 8.5         | 4.9  | 4.0  | 1.2         | 0.8         | 8.8  | 2.4         | <u>8.9</u>  | <u>14.2</u> | 2.4         | 10.4 | 2.8  | 5.8         |
